# Supplementary material for: G Protein-Coupled Receptor Kinase 4 Is a Novel Prognostic Factor in Hepatocellular Carcinoma
Source: Hindawi journal article supplement (doi:10.1155/2022/2628879), 2022-06-20
Supplement: f1 [file 2628879.f1.zip]

**Supplementary Table 3. Correlation of peritumor GRK4 and clinicopathological characteristics in both cohorts**

|                   | Training Cohort |               |              |               |                 | Validation Cohort |               |               |              |                 |
|-------------------|-----------------|---------------|--------------|---------------|-----------------|-------------------|---------------|---------------|--------------|-----------------|
|                   | negative        | 1+            | 2+           | 3+            | <i>P</i> -value | negative          | 1+            | 2+            | 3+           | <i>P</i> -value |
| N                 | 3               | 6             | 43           | 74            |                 | 9                 | 4             | 25            | 46           |                 |
| Age               | 51.33 ± 11.37   | 51.67 ± 11.20 | 50.79 ± 8.43 | 50.03 ± 11.23 | 0.97            | 57.89 ± 9.89      | 52.75 ± 10.53 | 53.40 ± 11.24 | 53.33 ± 9.74 | 0.66            |
| Tumor diameter    | 7.67 ± 2.31     | 7.17 ± 3.06   | 9.74 ± 4.01  | 8.39 ± 3.88   | 0.20            | 8.11 ± 4.55       | 3.38 ± 1.38   | 7.66 ± 4.33   | 7.90 ± 5.39  | 0.36            |
| Status            |                 |               |              |               | 0.65            |                   |               |               |              | 0.79            |
| Alive             | 2 (66.67%)      | 3 (50.00%)    | 15 (34.88%)  | 27 (36.49%)   |                 | 4 (44.44%)        | 1 (25.00%)    | 11 (44.00%)   | 16 (34.78%)  |                 |
| Dead              | 1 (33.33%)      | 3 (50.00%)    | 28 (65.12%)  | 47 (63.51%)   |                 | 5 (55.56%)        | 3 (75.00%)    | 14 (56.00%)   | 30 (65.22%)  |                 |
| Gender            |                 |               |              |               | 0.82            |                   |               |               |              | 0.58            |
| Male              | 3 (100.00%)     | 5 ( 83.33%)   | 36 ( 83.72%) | 65 ( 87.84%)  |                 | 9 (100.00%)       | 3 ( 75.00%)   | 22 ( 88.00%)  | 41 ( 89.13%) |                 |
| Female            | 0 ( 0.00%)      | 1 ( 16.67%)   | 7 ( 16.28%)  | 9 ( 12.16%)   |                 | 0 ( 0.00%)        | 1 ( 25.00%)   | 3 ( 12.00%)   | 5 ( 10.87%)  |                 |
| Anatomic location |                 |               |              |               | 0.67            |                   |               |               |              | 0.17            |
| Left or other     | 1 (33.33%)      | 4 (66.67%)    | 18 (41.86%)  | 35 (47.30%)   |                 | 1 (11.11%)        | 1 (25.00%)    | 7 (28.00%)    | 4 ( 8.70%)   |                 |
| Right             | 2 (66.67%)      | 2 (33.33%)    | 25 (58.14%)  | 39 (52.70%)   |                 | 8 (88.89%)        | 3 (75.00%)    | 18 (72.00%)   | 42 (91.30%)  |                 |
| Number of tumors  |                 |               |              |               | 0.36            |                   |               |               |              | 0.26            |
| Solitary          | 3 (100.00%)     | 3 ( 50.00%)   | 33 ( 76.74%) | 52 ( 70.27%)  |                 | 9 (100.00%)       | 4 (100.00%)   | 24 ( 96.00%)  | 39 ( 84.78%) |                 |
| Multiple          | 0 ( 0.00%)      | 3 ( 50.00%)   | 10 ( 23.26%) | 22 ( 29.73%)  |                 | 0 ( 0.00%)        | 0 ( 0.00%)    | 1 ( 4.00%)    | 7 ( 15.22%)  |                 |
| Tumor type        |                 |               |              |               | 0.24            |                   |               |               |              | 0.37            |
| Nodular           | 3 (100.00%)     | 2 ( 33.33%)   | 18 ( 41.86%) | 34 ( 45.95%)  |                 | 5 ( 55.56%)       | 4 (100.00%)   | 14 ( 56.00%)  | 25 ( 54.35%) |                 |
| Mass or diffuse   | 0 ( 0.00%)      | 4 ( 66.67%)   | 25 ( 58.14%) | 40 ( 54.05%)  |                 | 4 ( 44.44%)       | 0 ( 0.00%)    | 11 ( 44.00%)  | 21 ( 45.65%) |                 |
| Cirrhosis         |                 |               |              |               | 0.17            |                   |               |               |              | 0.09            |
| No                | 0 ( 0.00%)      | 1 ( 16.67%)   | 22 ( 51.16%) | 34 ( 45.95%)  |                 | 4 (44.44%)        | 2 (50.00%)    | 20 (80.00%)   | 24 (52.17%)  |                 |
| Yes               | 3 (100.00%)     | 5 ( 83.33%)   | 21 ( 48.84%) | 40 ( 54.05%)  |                 | 5 (55.56%)        | 2 (50.00%)    | 5 (20.00%)    | 22 (47.83%)  |                 |
| Venous invasion   |                 |               |              |               | 0.41            |                   |               |               |              | 0.08            |
| No                | 3 (100.00%)     | 3 ( 50.00%)   | 32 ( 74.42%) | 51 ( 68.92%)  |                 | 9 (100.00%)       | 4 (100.00%)   | 24 ( 96.00%)  | 36 ( 78.26%) |                 |
| Yes               | 0 ( 0.00%)      | 3 ( 50.00%)   | 11 ( 25.58%) | 23 ( 31.08%)  |                 | 0 ( 0.00%)        | 0 ( 0.00%)    | 1 ( 4.00%)    | 10 ( 21.74%) |                 |
| Grade             |                 |               |              |               | 0.17            |                   |               |               |              | 0.10            |

|            |          |             |             |              |              |  |             |             |              |              |      |      |
|------------|----------|-------------|-------------|--------------|--------------|--|-------------|-------------|--------------|--------------|------|------|
| T Stage    | 1        | 2 ( 66.67%) | 0 ( 0.00%)  | 5 ( 11.63%)  | 12 ( 16.22%) |  | 3 ( 33.33%) | 0 ( 0.00%)  | 2 ( 8.00%)   | 2 ( 4.35%)   | 0.67 | 0.55 |
|            | 2        | 1 ( 33.33%) | 6 (100.00%) | 32 ( 74.42%) | 53 ( 71.62%) |  | 6 ( 66.67%) | 4 (100.00%) | 19 ( 76.00%) | 36 ( 78.26%) |      |      |
|            | 3        | 0 ( 0.00%)  | 0 ( 0.00%)  | 6 ( 13.95%)  | 9 ( 12.16%)  |  | 0 ( 0.00%)  | 0 ( 0.00%)  | 4 ( 16.00%)  | 8 ( 17.39%)  |      |      |
|            | 4        | 0 ( 0.00%)  | 0 ( 0.00%)  | 1 ( 2.33%)   | 4 ( 5.41%)   |  | 0 ( 0.00%)  | 0 ( 0.00%)  | 0 ( 0.00%)   | 5 (10.87%)   |      |      |
| GRK4 Tumor | negative | 0 ( 0.00%)  | 3 (50.00%)  | 19 (44.19%)  | 31 (41.89%)  |  | 5 (55.56%)  | 1 (25.00%)  | 9 (36.00%)   | 23 (50.00%)  | 0.05 | 0.26 |
|            | 1+       | 1 (33.33%)  | 1 (16.67%)  | 5 (11.63%)   | 18 (24.32%)  |  | 2 (22.22%)  | 2 (50.00%)  | 9 (36.00%)   | 6 (13.04%)   |      |      |
|            | 2+       | 1 (33.33%)  | 0 ( 0.00%)  | 8 (18.60%)   | 21 (28.38%)  |  | 0 ( 0.00%)  | 0 ( 0.00%)  | 2 ( 8.00%)   | 10 (21.74%)  |      |      |
|            | 3+       | 1 (33.33%)  | 2 (33.33%)  | 11 (25.58%)  | 4 ( 5.41%)   |  | 2 (22.22%)  | 1 (25.00%)  | 5 (20.00%)   | 7 (15.22%)   |      |      |
|            |          |             |             |              |              |  |             |             |              |              |      |      |
