# Supplementary material for: G Protein-Coupled Receptor Kinase 4 Is a Novel Prognostic Factor in Hepatocellular Carcinoma
Source: Hindawi journal article supplement (doi:10.1155/2022/2628879), 2022-06-20
Supplement: f1 [file 2628879.f1.zip]

**Supplementary Table 2. Correlation of tumor GRK4 and clinicopathological characteristics**

|                   | Training Cohort |              |               |              |                 | Validation Cohort |              |               |              |                 |
|-------------------|-----------------|--------------|---------------|--------------|-----------------|-------------------|--------------|---------------|--------------|-----------------|
|                   | negative        | 1+           | 2+            | 3+           | <i>P</i> -value | negative          | 1+           | 2+            | 3+           | <i>P</i> -value |
| N                 | 53              | 25           | 30            | 18           |                 | 40                | 20           | 13            | 16           |                 |
| Age               | 49.36 ± 11.26   | 48.40 ± 8.97 | 53.90 ± 10.26 | 50.39 ± 7.72 | 0.17            | 52.02 ± 9.58      | 55.30 ± 9.02 | 55.85 ± 13.23 | 54.62 ± 9.66 | 0.51            |
| Tumor diameter    | 8.62 ± 3.88     | 9.24 ± 3.87  | 8.00 ± 3.60   | 9.89 ± 4.44  | 0.38            | 7.25 ± 4.54       | 7.35 ± 4.55  | 7.58 ± 6.09   | 9.06 ± 7.94  | 0.72            |
| Status            |                 |              |               |              | <0.01           |                   |              |               |              | 0.04            |
| Alive             | 8 (15.09%)      | 10 (40.00%)  | 18 (60.00%)   | 11 (61.11%)  |                 | 11 (27.50%)       | 8 (40.00%)   | 4 (30.77%)    | 11 (68.75%)  |                 |
| Dead              | 45 (84.91%)     | 15 (60.00%)  | 12 (40.00%)   | 7 (38.89%)   |                 | 29 (72.50%)       | 12 (60.00%)  | 9 (69.23%)    | 5 (31.25%)   |                 |
| Gender            |                 |              |               |              | 0.40            |                   |              |               |              | 0.58            |
| Male              | 43 (81.13%)     | 23 (92.00%)  | 26 (86.67%)   | 17 (94.44%)  |                 | 34 (85.00%)       | 19 (95.00%)  | 12 (92.31%)   | 15 (93.75%)  |                 |
| Female            | 10 (18.87%)     | 2 ( 8.00%)   | 4 (13.33%)    | 1 ( 5.56%)   |                 | 6 (15.00%)        | 1 ( 5.00%)   | 1 ( 7.69%)    | 1 ( 6.25%)   |                 |
| Anatomic location |                 |              |               |              | 0.98            |                   |              |               |              | 0.20            |
| Left or other     | 24 (45.28%)     | 11 (44.00%)  | 14 (46.67%)   | 9 (50.00%)   |                 | 3 ( 7.50%)        | 4 (20.00%)   | 4 (30.77%)    | 3 (18.75%)   |                 |
| Right             | 29 (54.72%)     | 14 (56.00%)  | 16 (53.33%)   | 9 (50.00%)   |                 | 37 (92.50%)       | 16 (80.00%)  | 9 (69.23%)    | 13 (81.25%)  |                 |
| Number of tumors  |                 |              |               |              | 0.95            |                   |              |               |              | 0.98            |
| Solitary          | 38 (71.70%)     | 18 (72.00%)  | 21 (70.00%)   | 14 (77.78%)  |                 | 36 (90.00%)       | 18 (90.00%)  | 12 (92.31%)   | 14 (87.50%)  |                 |
| Multiple          | 15 (28.30%)     | 7 (28.00%)   | 9 (30.00%)    | 4 (22.22%)   |                 | 4 (10.00%)        | 2 (10.00%)   | 1 ( 7.69%)    | 2 (12.50%)   |                 |
| Tumor type        |                 |              |               |              | 0.43            |                   |              |               |              | 0.97            |
| Nodular           | 24 (45.28%)     | 9 (36.00%)   | 17 (56.67%)   | 7 (38.89%)   |                 | 23 (57.50%)       | 12 (60.00%)  | 7 (53.85%)    | 10 (62.50%)  |                 |
| Mass or diffuse   | 29 (54.72%)     | 16 (64.00%)  | 13 (43.33%)   | 11 (61.11%)  |                 | 17 (42.50%)       | 8 (40.00%)   | 6 (46.15%)    | 6 (37.50%)   |                 |
| Cirrhosis         |                 |              |               |              | 0.87            |                   |              |               |              | 0.37            |
| No                | 23 (43.40%)     | 12 (48.00%)  | 15 (50.00%)   | 7 (38.89%)   |                 | 23 (57.50%)       | 10 (50.00%)  | 6 (46.15%)    | 12 (75.00%)  |                 |
| Yes               | 30 (56.60%)     | 13 (52.00%)  | 15 (50.00%)   | 11 (61.11%)  |                 | 17 (42.50%)       | 10 (50.00%)  | 7 (53.85%)    | 4 (25.00%)   |                 |
| Venous invasion   |                 |              |               |              | 0.13            |                   |              |               |              | 0.50            |
| No                | 39 (73.58%)     | 13 (52.00%)  | 24 (80.00%)   | 13 (72.22%)  |                 | 35 (87.50%)       | 19 (95.00%)  | 10 (76.92%)   | 14 (87.50%)  |                 |
| Yes               | 14 (26.42%)     | 12 (48.00%)  | 6 (20.00%)    | 5 (27.78%)   |                 | 5 (12.50%)        | 1 ( 5.00%)   | 3 (23.08%)    | 2 (12.50%)   |                 |
| Grade             |                 |              |               |              | 0.36            |                   |              |               |              | 0.16            |

|                |          |             |             |             |             |      |             |             |             |             |      |
|----------------|----------|-------------|-------------|-------------|-------------|------|-------------|-------------|-------------|-------------|------|
|                | 1        | 5 ( 9.43%)  | 7 (28.00%)  | 5 (16.67%)  | 2 (11.11%)  |      | 1 ( 2.50%)  | 2 (10.00%)  | 1 ( 7.69%)  | 3 (18.75%)  |      |
|                | 2        | 42 (79.25%) | 15 (60.00%) | 20 (66.67%) | 15 (83.33%) |      | 31 (77.50%) | 17 (85.00%) | 12 (92.31%) | 10 (62.50%) |      |
|                | 3        | 6 (11.32%)  | 3 (12.00%)  | 5 (16.67%)  | 1 ( 5.56%)  |      | 8 (20.00%)  | 1 ( 5.00%)  | 0 ( 0.00%)  | 3 (18.75%)  |      |
| T Stage        |          |             |             |             |             | 0.37 |             |             |             |             | 0.45 |
|                | 1        | 19 (35.85%) | 5 (20.00%)  | 13 (43.33%) | 5 (27.78%)  |      | 13 (32.50%) | 7 (35.00%)  | 8 (61.54%)  | 7 (43.75%)  |      |
|                | 2        | 10 (18.87%) | 6 (24.00%)  | 7 (23.33%)  | 7 (38.89%)  |      | 7 (17.50%)  | 4 (20.00%)  | 1 ( 7.69%)  | 3 (18.75%)  |      |
|                | 3        | 23 (43.40%) | 12 (48.00%) | 8 (26.67%)  | 6 (33.33%)  |      | 19 (47.50%) | 8 (40.00%)  | 2 (15.38%)  | 5 (31.25%)  |      |
|                | 4        | 1 ( 1.89%)  | 2 ( 8.00%)  | 2 ( 6.67%)  | 0 ( 0.00%)  |      | 1 ( 2.50%)  | 1 ( 5.00%)  | 2 (15.38%)  | 1 ( 6.25%)  |      |
| GRK4 peritumor |          |             |             |             |             | 0.05 |             |             |             |             | 0.26 |
|                | negative | 0 ( 0.00%)  | 1 ( 4.00%)  | 1 ( 3.33%)  | 1 ( 5.56%)  |      | 5 (13.16%)  | 2 (10.53%)  | 0 ( 0.00%)  | 2 (13.33%)  |      |
|                | 1+       | 3 ( 5.66%)  | 1 ( 4.00%)  | 0 ( 0.00%)  | 2 (11.11%)  |      | 1 ( 2.63%)  | 2 (10.53%)  | 0 ( 0.00%)  | 1 ( 6.67%)  |      |
|                | 2+       | 19 (35.85%) | 5 (20.00%)  | 8 (26.67%)  | 11 (61.11%) |      | 9 (23.68%)  | 9 (47.37%)  | 2 (16.67%)  | 5 (33.33%)  |      |
|                | 3+       | 31 (58.49%) | 18 (72.00%) | 21 (70.00%) | 4 (22.22%)  |      | 23 (60.53%) | 6 (31.58%)  | 10 (83.33%) | 7 (46.67%)  |      |
