# Supplementary material for: G Protein-Coupled Receptor Kinase 4 Is a Novel Prognostic Factor in Hepatocellular Carcinoma
Source: Hindawi journal article supplement (doi:10.1155/2022/2628879), 2022-06-20
Supplement: f1 [file 2628879.f1.zip]

Supplementary Table 1. Baseline characteristics in both cohorts

| Variable                     | Training cohort,n(%) | Validation cohort,n(%) | P-value |
|------------------------------|----------------------|------------------------|---------|
|                              | n=126                | n=89                   |         |
| Follow time, median, month   | 29                   | 79                     | 0.207   |
| Age , mean(sd), y            | 50.40 (10.24)        | 53.79 ( 10.03)         | 0.017   |
| Tumor diameter, mean(SD), cm | 8.78 (3.90)          | 7.64 (5.46)            | 0.077   |
| Status                       |                      |                        | 0.893   |
| Alive                        | 47 (37.30%)          | 34 (38.20%)            |         |
| Dead                         | 79 (62.70%)          | 55 (61.80%)            |         |
| Gender                       |                      |                        | 0.454   |
| Male                         | 109 (86.51%)         | 80 (89.89%)            |         |
| Female                       | 17 (13.49%)          | 9 (10.11%)             |         |
| Anatomic Location            |                      |                        | <0.001  |
| Left or other                | 58 (46.03%)          | 14 (15.73%)            |         |
| Right                        | 68 (53.97%)          | 75 (84.27%)            |         |
| Number of tumors             |                      |                        | 0.002   |
| Solitary                     | 91 (72.22%)          | 80 (89.89%)            |         |
| Multiple                     | 35 (27.78%)          | 9 (10.11%)             |         |
| Tumor type                   |                      |                        | 0.057   |
| Nodular                      | 57 (45.24%)          | 52 (58.43%)            |         |
| Mass or diffuse              | 69 (54.76%)          | 37 (41.57%)            |         |
| Cirrhosis                    |                      |                        | 0.081   |
| No                           | 57 (45.24%)          | 51 (57.30%)            |         |
| Yes                          | 69 (54.76%)          | 38 (42.70%)            |         |
| PVTT <sup>a</sup>            |                      |                        | 0.003   |
| No                           | 89 (70.63%)          | 78 (87.64%)            |         |
| Yes                          | 37 (29.37%)          | 11 (12.36%)            |         |
| Histological grade           |                      |                        | 0.277   |
| 1                            | 19 (15.08%)          | 7 ( 7.87%)             |         |
| 2                            | 92 (73.02%)          | 70 (78.65%)            |         |
| 3                            | 15 (11.90%)          | 12 (13.48%)            |         |
| T Stage                      |                      |                        | 0.564   |
| 1                            | 42 (33.33%)          | 35 (39.33%)            |         |
| 2                            | 30 (23.81%)          | 15 (16.85%)            |         |
| 3                            | 49 (38.89%)          | 34 (38.20%)            |         |
| 4                            | 5 ( 3.97%)           | 5 ( 5.62%)             |         |
| GRK4 peritumor               |                      |                        | 0.087   |

---

|            |          |             |             |       |
|------------|----------|-------------|-------------|-------|
|            | negative | 3 ( 2.38%)  | 9 (10.71%)  |       |
|            | 1+       | 6 ( 4.76%)  | 4 ( 4.76%)  |       |
|            | 2+       | 43 (34.13%) | 25 (29.76%) |       |
|            | 3+       | 74 (58.73%) | 46 (54.76%) |       |
| GRK4 tumor |          |             |             | 0.402 |
|            | negative | 53 (42.06%) | 40 (44.94%) |       |
|            | 1+       | 25 (19.84%) | 20 (22.47%) |       |
|            | 2+       | 30 (23.81%) | 13 (14.61%) |       |
|            | 3+       | 18 (14.29%) | 16 (17.98%) |       |

---

a: PVTT, portal vein tumor thrombus
